# Supplementary material for: A statistical study of the motion of pulsating aurora patches: using the THEMIS All-Sky Imager
Source: Copernicus journal article supplement (doi:10.5194/angeo-35-217-2017), 2017-02-08
Supplement: Supplementary file 1 [file angeo-35-217-2017-supplement.zip]

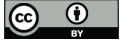

## *Supplement of*

# **A statistical study of the motion of pulsating aurora patches: using the THEMIS All-Sky Imager**

**Bing Yang et al.**

*Correspondence to:* Bing Yang (biyang@ucalgary.ca)

- [angeo-35-217-2017-supplement-title-page.pdf](#)
- [PPA east-west motion.avi](#)
- [event\\_list.txt](#)

The copyright of individual parts of the supplement might differ from the CC-BY 3.0 licence.
